# Supplementary material for: HLA-B*13, B*35 and B*39 Alleles Are Closely Associated With the Lack of Response to ART in HIV Infection: A Cohort Study in a Population of Northern Brazil
Source: PubMed Central journal article supplement (PMC8966405; doi:10.3389/fimmu.2022.829126), 2022-03-16
Supplement: Table_1.pdf [file Table_1.pdf]

**Supplementary Table 1-** HLA class I and II allele frequencies for loci A, B and DRB1 among nonresponder and responder PLHIVs.

| Alleles       | Nonresponders |       | Responders |       | p      | G test  | Nonresponders                                        | Responders                                           |
|---------------|---------------|-------|------------|-------|--------|---------|------------------------------------------------------|------------------------------------------------------|
|               | N             | %     | N          | %     |        |         | x <sup>2</sup> Residuals<br>( $\alpha$ : 0.05): 1.96 | x <sup>2</sup> Residuals<br>( $\alpha$ : 0.05): 1.96 |
| A*01          | 14            | 5.15  | 14         | 5.26  | 0.9319 | 10.8120 | -0.0606                                              | 0.0606                                               |
| A*02          | 68            | 25.00 | 66         | 24.81 |        |         | 0.0504                                               | -0.0504                                              |
| A*03          | 16            | 5.88  | 14         | 5.26  |        |         | 0.3129                                               | -0.3129                                              |
| A*11          | 14            | 5.15  | 16         | 6.02  |        |         | -0.4387                                              | 0.4387                                               |
| A*23          | 16            | 5.88  | 16         | 6.02  |        |         | -0.0651                                              | 0.0651                                               |
| A*24          | 45            | 16.54 | 28         | 10.53 |        |         | 2.0378                                               | -2.0378                                              |
| A*26          | 6             | 2.21  | 9          | 3.38  |        |         | -0.8295                                              | 0.8295                                               |
| A*29          | 10            | 3.68  | 10         | 3.76  |        |         | -0.0508                                              | 0.0508                                               |
| A*30          | 14            | 5.15  | 10         | 3.76  |        |         | 0.7795                                               | -0.7795                                              |
| A*31          | 26            | 9.56  | 30         | 11.28 |        |         | -0.6529                                              | 0.6529                                               |
| A*32          | 5             | 1.84  | 8          | 3.01  |        |         | -0.8830                                              | 0.8830                                               |
| A*33          | 4             | 1.47  | 7          | 2.63  |        |         | -0.9514                                              | 0.9514                                               |
| A*34          | 1             | 0.37  | 3          | 1.13  |        |         | -1.0262                                              | 1.0262                                               |
| A*36          | 2             | 0.74  | 1          | 0.38  |        |         | 0.5596                                               | -0.5596                                              |
| A*66          | 3             | 1.10  | 2          | 0.75  |        |         | 0.4243                                               | -0.4243                                              |
| A*68          | 24            | 8.82  | 25         | 9.40  |        |         | -0.2317                                              | 0.2317                                               |
| A*69          | 0             | 0.00  | 1          | 0.38  |        |         | -1.0122                                              | 1.0122                                               |
| A*74          | 3             | 1.10  | 5          | 1.88  |        |         | -0.7443                                              | 0.7443                                               |
| A*80          | 1             | 0.37  | 1          | 0.38  |        |         | -0.0158                                              | 0.0158                                               |
| Homozygotes   | 14            | 0.10  | 19         | 0.14  | 0.3561 | 0.9983  | -0.9977                                              | 0.9977                                               |
| Heterozygotes | 122           | 0.90  | 114        | 0.86  |        |         | 0.9977                                               | -0.9977                                              |
| B*07          | 13            | 6.19  | 18         | 8.49  | 0.0451 | 40.1008 | -0.9193                                              | 0.9193                                               |
| B*08          | 8             | 3.81  | 7          | 3.30  |        |         | 0.2723                                               | -0.2723                                              |
| B*13          | 4             | 1.90  | 0          | 0.00  |        |         | 2.0143                                               | -2.0143                                              |
| B*14          | 9             | 4.29  | 13         | 6.13  |        |         | -0.8646                                              | 0.8646                                               |
| B*15          | 28            | 13.33 | 20         | 9.43  |        |         | 1.2442                                               | -1.2442                                              |

|               |    |       |    |       |        |         |         |         |
|---------------|----|-------|----|-------|--------|---------|---------|---------|
| B*18          | 8  | 3.81  | 11 | 5.19  |        |         | -0.6937 | 0.6937  |
| B*35          | 42 | 20.00 | 26 | 12.26 |        |         | 2.2861  | -2.2861 |
| B*38          | 2  | 0.95  | 6  | 2.83  |        |         | -1.4211 | 1.4211  |
| B*39          | 19 | 9.05  | 6  | 2.83  |        |         | 2.6931  | -2.6931 |
| B*40          | 9  | 4.29  | 15 | 7.08  |        |         | -1.2492 | 1.2492  |
| B*42          | 2  | 0.95  | 1  | 0.47  |        |         | 0.5835  | -0.5835 |
| B*44          | 15 | 7.14  | 27 | 12.74 |        |         | -1.9353 | 1.9353  |
| B*45          | 3  | 1.43  | 2  | 0.94  |        |         | 0.4552  | -0.4552 |
| B*51          | 13 | 6.19  | 15 | 7.08  |        |         | -0.3782 | 0.3782  |
| B*52          | 7  | 3.33  | 8  | 3.77  |        |         | -0.2536 | 0.2536  |
| B*37          | 1  | 0.48  | 1  | 0.47  |        |         | 0.0034  | -0.0034 |
| B*47          | 0  | 0.00  | 1  | 0.47  |        |         | -0.9988 | 0.9988  |
| B*49          | 5  | 2.38  | 3  | 1.42  |        |         | 0.7207  | -0.7207 |
| B*50          | 2  | 0.95  | 2  | 0.94  |        |         | 0.0048  | -0.0048 |
| B*53          | 7  | 3.33  | 6  | 2.83  |        |         | 0.2904  | -0.2904 |
| B*57          | 4  | 1.90  | 4  | 1.89  |        |         | 0.0068  | -0.0068 |
| B*58          | 5  | 2.38  | 10 | 4.72  |        |         | -1.3053 | 1.3053  |
| B*41          | 0  | 0.00  | 3  | 1.42  |        |         | -1.7341 | 1.7341  |
| B*48          | 2  | 0.95  | 2  | 0.94  |        |         | 0.0048  | -0.0048 |
| B*55          | 0  | 0.00  | 3  | 1.42  |        |         | -1.7341 | 1.7341  |
| B*27          | 1  | 0.48  | 0  | 0.00  |        |         | 1.0036  | -1.0036 |
| B*56          | 1  | 0.48  | 0  | 0.00  |        |         | 1.0036  | -1.0036 |
| B*78          | 0  | 0.00  | 2  | 0.94  |        |         | -1.4142 | 1.4142  |
| Homozygotes   | 10 | 0.10  | 13 | 0.12  | 0.6760 | 0.4090  | -0.6386 | 0.6386  |
| Heterozygotes | 95 | 0.90  | 93 | 0.88  |        |         | 0.6386  | -0.6386 |
| Bw4           | 36 | 0.30  | 33 | 0.30  | 0.9386 | 0.127   | -0.0865 | 0.0865  |
| Bw4/Bw6       | 57 | 0.47  | 49 | 0.45  |        |         | 0.3271  | -0.3271 |
| Bw6           | 28 | 0.23  | 27 | 0.25  |        |         | -0.2894 | 0.2894  |
| DRB1*01       | 27 | 10.15 | 24 | 8.96  | 0.1516 | 17.3648 | 0.4698  | -0.4698 |
| DRB1*03       | 23 | 8.65  | 15 | 5.60  |        |         | 1.3705  | -1.3705 |

|               |     |       |     |       |        |       |         |         |
|---------------|-----|-------|-----|-------|--------|-------|---------|---------|
| DRB1*04       | 38  | 14.29 | 31  | 11.57 |        |       | 0.9364  | -0.9364 |
| DRB1*07       | 28  | 10.53 | 36  | 13.43 |        |       | -1.0340 | 1.0340  |
| DRB1*08       | 28  | 10.53 | 18  | 6.72  |        |       | 1.5689  | -1.5689 |
| DRB1*09       | 6   | 2.26  | 5   | 1.87  |        |       | 0.3172  | -0.3172 |
| DRB1*10       | 5   | 1.88  | 1   | 0.37  |        |       | 1.6515  | -1.6515 |
| DRB1*11       | 26  | 9.77  | 30  | 11.19 |        |       | -0.5353 | 0.5353  |
| DRB1*12       | 5   | 1.88  | 3   | 1.12  |        |       | 0.7231  | -0.7231 |
| DRB1*13       | 27  | 10.15 | 44  | 16.42 |        |       | -2.1328 | 2.1328  |
| DRB1*14       | 26  | 9.77  | 20  | 7.46  |        |       | 0.9520  | -0.9520 |
| DRB1*15       | 15  | 5.64  | 23  | 8.58  |        |       | -1.3226 | 1.3226  |
| DRB1*16       | 12  | 4.51  | 18  | 6.72  |        |       | -1.1065 | 1.1065  |
| Homozygotes   | 16  | 0.12  | 17  | 0.13  | 0.9817 | 0.027 | -0.1630 | 0.1630  |
| Heterozygotes | 117 | 0.86  | 117 | 0.87  |        |       | 0.1630  | -0.1630 |

---
